# Supplementary material
Source: publisher figshare collection journal article supplement (https://frontiersin.figshare.com/ndownloader/files/15765569)
Supplement: Supplementary file [file 15765569]

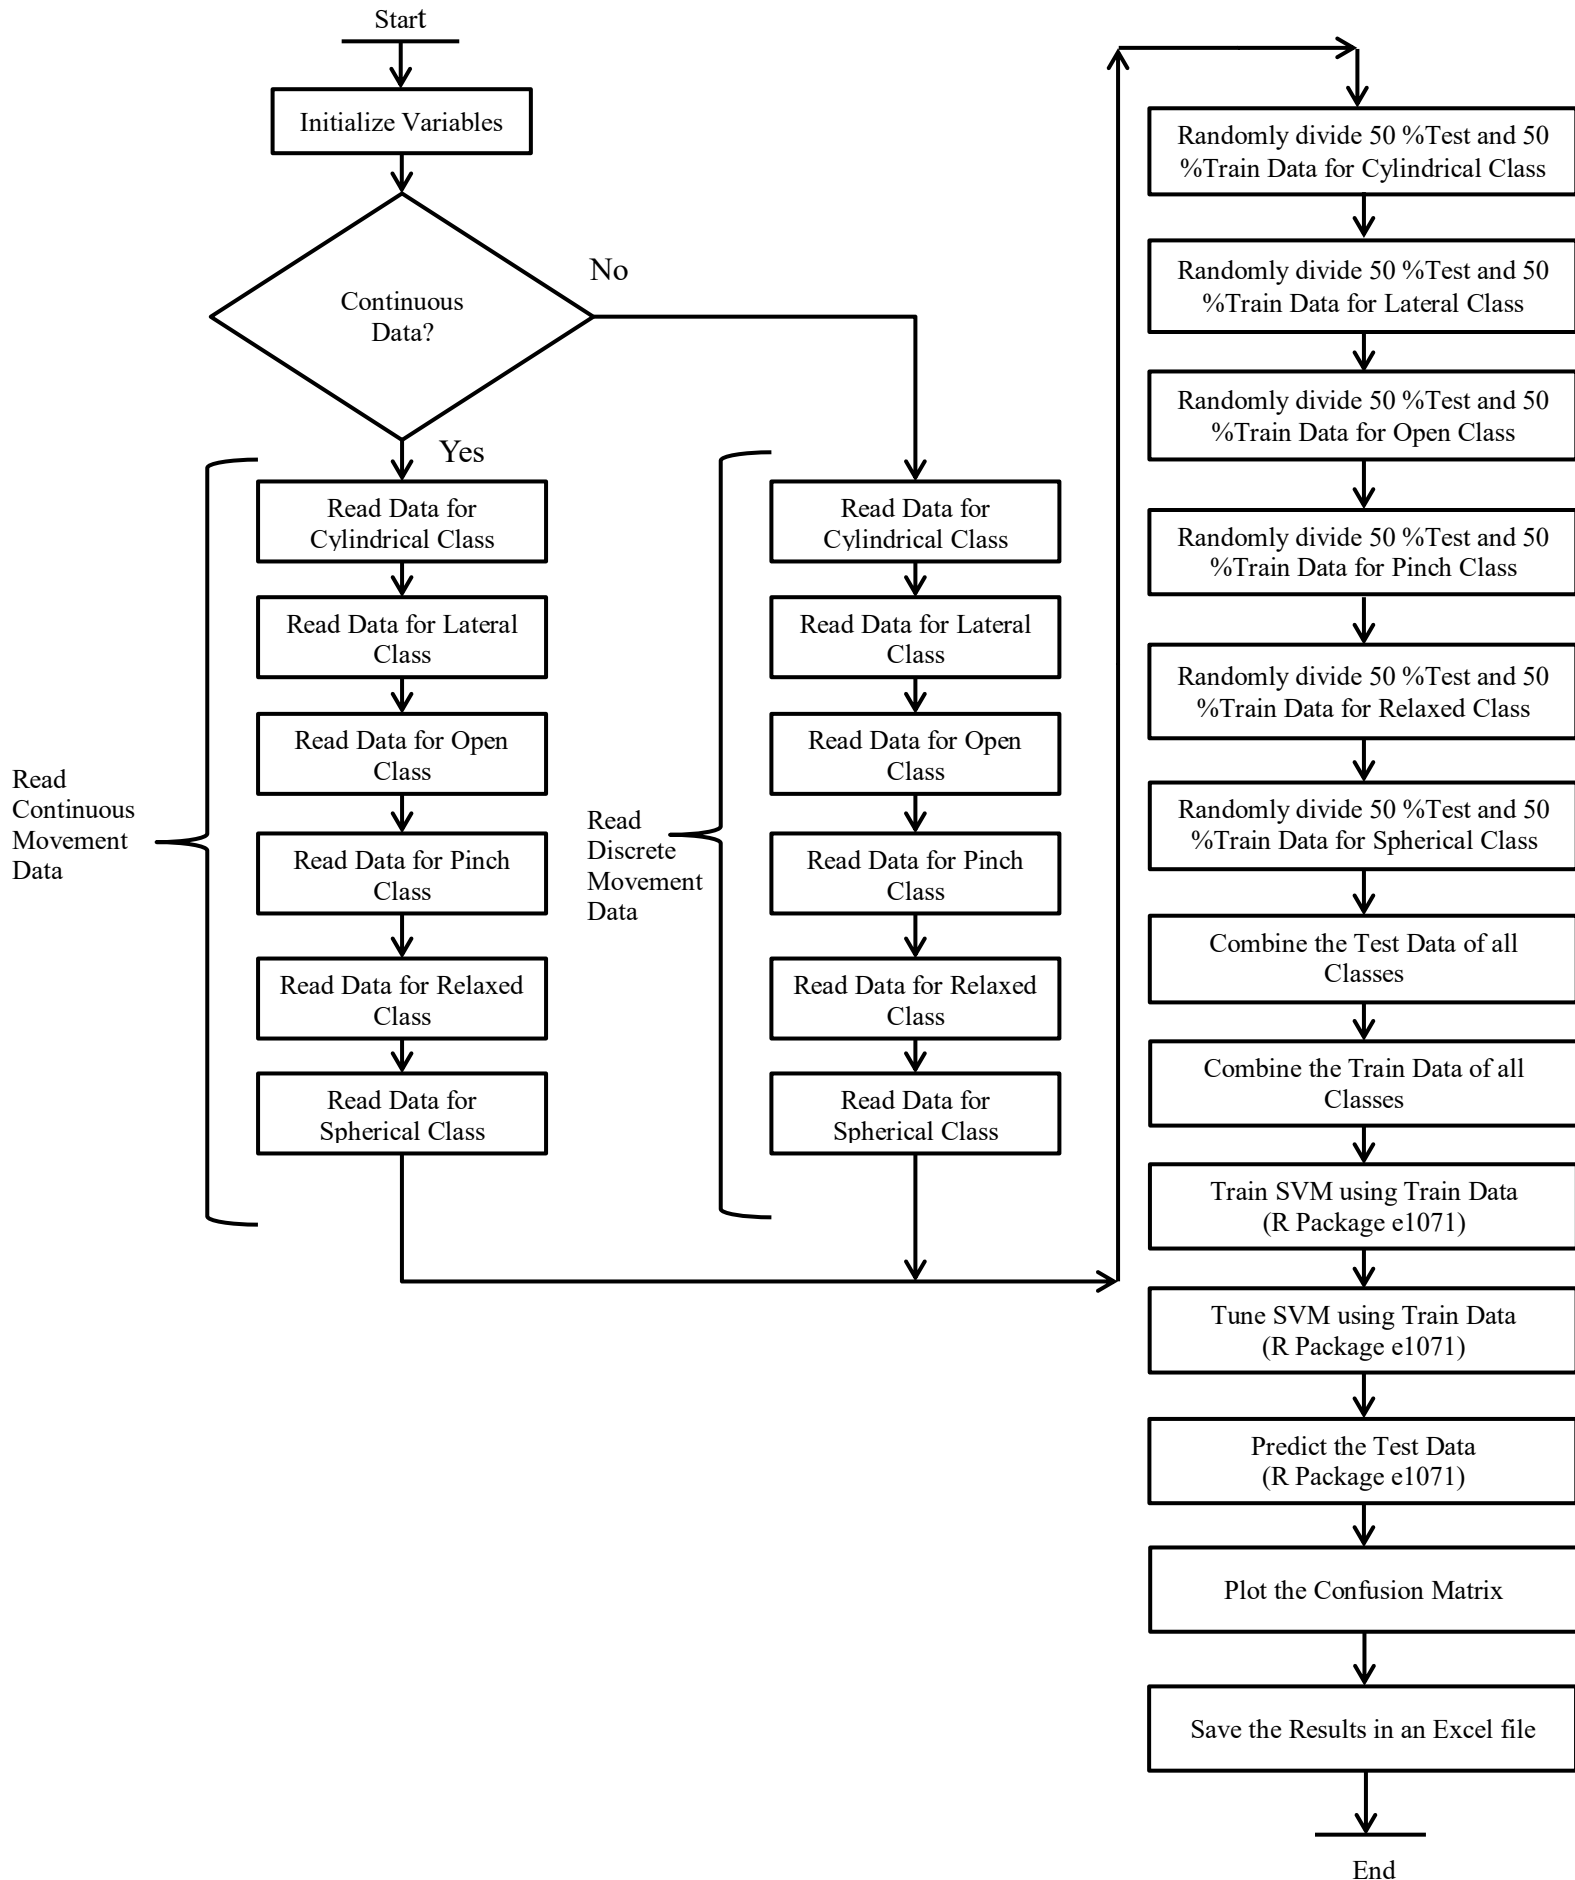

**Supplementary Figure 3.** Flow diagram for training and testing of the SVM classifier for both the discrete and continuous position data.
